# Supplementary material for: Fully Roll-to-Roll Gravure Printable Wireless (13.56 MHz) Sensor-Signage Tags for Smart Packaging
Source: PubMed Central journal article supplement — Sci Rep. 2014 Jun 23;4:5387. doi: 10.1038/srep05387 (PMC4066254; doi:10.1038/srep05387), 2014-06-23
Supplement: srep05387-s3.pdf [file srep05387-s3.pdf]

**Fully Roll-to-Roll Gravure Printable Wireless (13.56 MHz) Sensor-Signage Tags for  
Smart Packaging**

Hwiwon Kang,<sup>1,2</sup> Hyejin Park,<sup>2</sup> Yongsu Park,<sup>1</sup>  
Minhoon Jung,<sup>1</sup> Byoung Cheol Kim,<sup>3,4</sup> Gordon Wallace<sup>4</sup> & Gyoujin Cho<sup>2\*</sup>

<sup>1</sup>*Printed Electronics Research Institute, Paru Co., Suncheon, Jeonnam, Korea,*

<sup>2</sup>*Printed Electronics Engineering in World Class University Program and Department of Chemical Engineering, Suncheon National University, 315 Maegok Suncheon, Jeonnam, Korea,*

<sup>3</sup>*Department of Chemistry, University of Dongguk-Seoul, 30, Pil-Dong-ro, 1-gil, Jung-gu, Seoul, 100-715, Korea*

<sup>4</sup>*ARC Centre of Excellence for Electromaterials Science (ACES), Intelligent Polymer Research Institute, AIIM Facility, Innovation Campus, University of Wollongong, Wollongong, NSW 2522, Australia.*

**Supplementary Information**

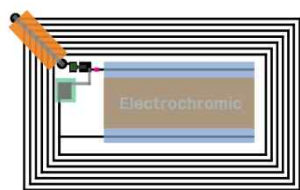

**Figure S1.** Design of antenna, diodes, capacitors and signage to be printed using R2R gravure.

**Optimized reading distance of R2R gravure printed antenna using various length of antenna**

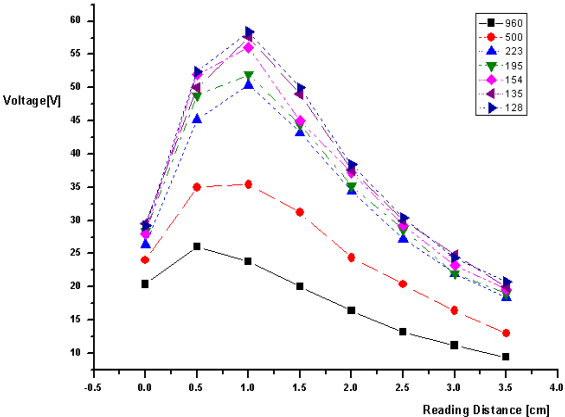

**Figure S2.** The graph of coupled AC voltages under various reading distances from NFC reader and various end to end resistance of printed antenna (inset shows the end to end resistances with ohm unit).

### **Optimized R2R gravure printed antenna**

**Table S1.** Values of coupled AC voltages depending on inductances and number of antenna turns as shown in Figure S2.

| <b>Turn</b> | <b>V<sub>pp</sub>(V)</b> | <b>Inductance(uH)</b> |
|-------------|--------------------------|-----------------------|
| <b>1</b>    | <b>4</b>                 | <b>0.59</b>           |
| <b>2</b>    | <b>8</b>                 | <b>0.74</b>           |
| <b>3</b>    | <b>12</b>                | <b>0.88</b>           |
| <b>4</b>    | <b>20</b>                | <b>0.96</b>           |
| <b>5</b>    | <b>35</b>                | <b>1.05</b>           |
| <b>6</b>    | <b>44</b>                | <b>1.1</b>            |

**Results of stability tests on printed rectenna**

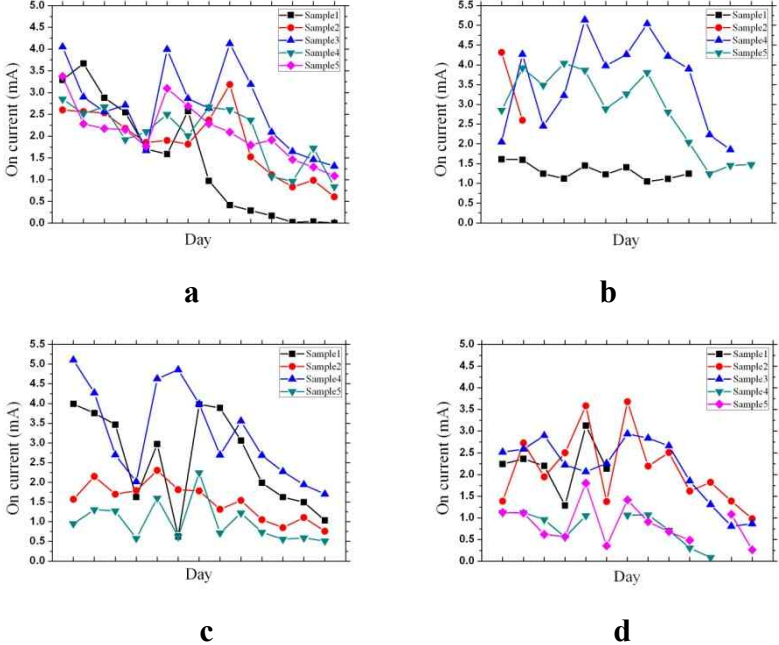

**Figure S3.** Stability results of on-currents of printed diodes with top electrodes of printed Al inks with various additives of epoxy (a), poly(butyl methacrylate co methyl methacrylate) (b), epoxy with blocked isocyanate group (c), and poly(ethylene terephthalate) (d). All the tests were carried out for 20 days under ambient condition (Instead of measuring output DC voltage, on current of printed diode was used to quick comparison).

### The movie of working concept of NFC-sensor-signage

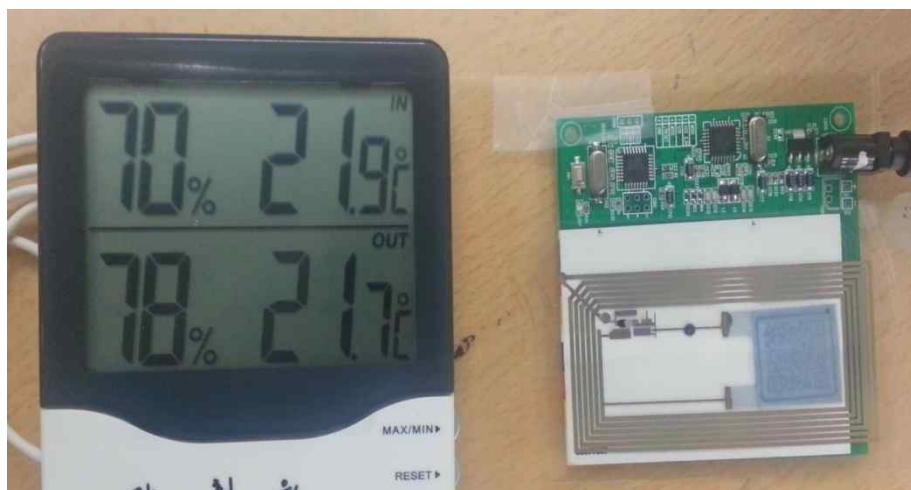

**Figure S4.** Image of working concept of smart packaging using R2R printed NFC-humidity sensor-signage. Click the image to see the movie file: the QR-Code will be only displayed when the relative humidity of surrounding is reached at 70%.

**Scheme for fully roll-to-roll (R2R) gravure printed wireless-QR code-sensor-tags**

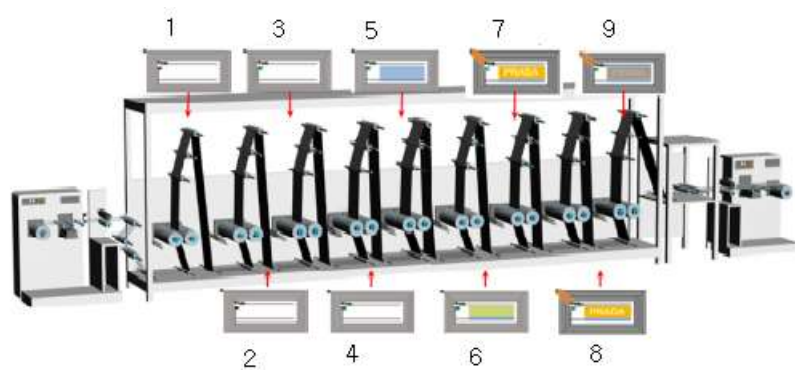

**Figure S5.** Concept image for fully R2R gravure printed wireless-QR code-humidity sensor-tags through 9 gravure printing units.
